# Supplementary material for: Dissection of the mechanism of traditional Chinese medical prescription-Yiqihuoxue formula as an effective anti-fibrotic treatment for systemic sclerosis
Source: PubMed Central journal article supplement (PMC4226964; doi:10.1186/1472-6882-14-224), 2014-07-07

S1

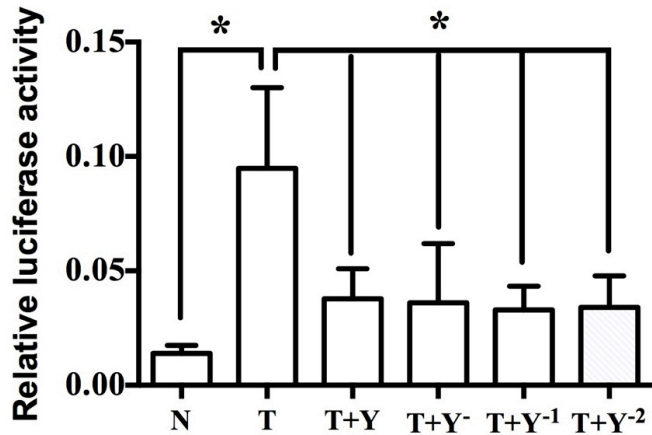

S2

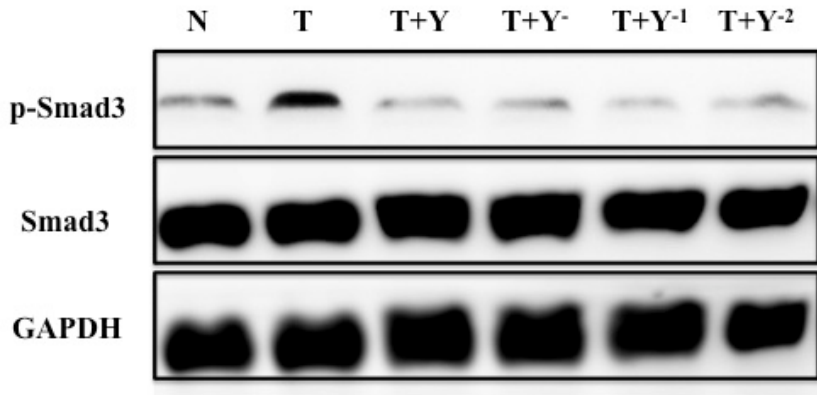

Supplement: 1472-6882-14-224-S1.pdf [file 1472-6882-14-224-S1.pdf]
